# Supplementary material for: Factors underlying masking release by voice-gender differences and spatial separation cues in multi-talker listening environments in listeners with and without hearing loss
Source: Front Neurosci. 2022 Nov 23;16:1059639. doi: 10.3389/fnins.2022.1059639 (PMC9726925; doi:10.3389/fnins.2022.1059639)
Supplement: Supplementary file 1 [file Table_1.XLSX]

## Sheet: VGRM
Model Info
Estimate		Linear mixed model fit by REML
Call		VGRM ~ 1 + Group + SpatialSeparation + ListeningConditon + Group:SpatialSeparation + Group:ListeningConditon + SpatialSeparation:ListeningConditon + Group:SpatialSeparation:ListeningConditon+( 1 | SubjectID )
AIC		572.916
BIC		607.273
LogLikel.		-269.145
R-squared Marginal		0.526
R-squared Conditional		0.719
Converged		yes
Optimizer		bobyqa
Fixed Effect Omnibus tests
					F	Num df	Den df	p
Group					30.88	1	21	< .001
SpatialSeparation					12.61	1	105	< .001
ListeningConditon					5.37	2	105	0.006
Group ✻ SpatialSeparation					14.91	1	105	< .001
Group ✻ ListeningConditon					6.1	2	105	0.003
SpatialSeparation ✻ ListeningConditon					21.06	2	105	< .001
Group ✻ SpatialSeparation ✻ ListeningConditon					4.69	2	105	0.011
Note. Satterthwaite method for degrees of freedom
Fixed Effects Parameter Estimates
										95% Confidence Interval
Names					Effect			Estimate	SE	Lower	Upper	df	t	p
(Intercept)					(Intercept)			5.147	0.307	4.545	5.748	21	16.77	< .001
Group1					HI - NH			-3.41	0.614	-4.614	-2.207	21	-5.56	< .001
SpatialSeparation1					60 - 0			-0.963	0.271	-1.494	-0.431	105	-3.55	< .001
ListeningConditon1					Left - Both			0.943	0.332	0.292	1.594	105	2.84	0.005
ListeningConditon2					Right - Both			0.943	0.332	0.292	1.594	105	2.84	0.005
Group1 ✻ SpatialSeparation1					HI - NH ✻ 60 - 0			2.095	0.542	1.032	3.158	105	3.86	< .001
Group1 ✻ ListeningConditon1					HI - NH ✻ Left - Both			-1.768	0.664	-3.07	-0.466	105	-2.66	0.009
Group1 ✻ ListeningConditon2					HI - NH ✻ Right - Both			-2.185	0.664	-3.487	-0.882	105	-3.29	0.001
SpatialSeparation1 ✻ ListeningConditon1					60 - 0 ✻ Left - Both			3.338	0.664	2.036	4.64	105	5.02	< .001
SpatialSeparation1 ✻ ListeningConditon2					60 - 0 ✻ Right - Both			4.033	0.664	2.731	5.335	105	6.07	< .001
Group1 ✻ SpatialSeparation1 ✻ ListeningConditon1					HI - NH ✻ 60 - 0 ✻ Left - Both			-4.035	1.329	-6.639	-1.43	105	-3.04	0.003
Group1 ✻ SpatialSeparation1 ✻ ListeningConditon2					HI - NH ✻ 60 - 0 ✻ Right - Both			-2.49	1.329	-5.094	0.114	105	-1.87	0.064

## Sheet: SRM
Model Info
Estimate		Linear mixed model fit by REML
Call		SRM ~ 1 + Group + GenderCombination + ListeningConditon + Group:GenderCombination + Group:ListeningConditon + GenderCombination:ListeningConditon + Group:GenderCombination:ListeningConditon+( 1 | SubjectID )
AIC		590.991
BIC		623.777
LogLikel.		-277.397
R-squared Marginal		0.765
R-squared Conditional		0.821
Converged		yes
Optimizer		bobyqa
Fixed Effect Omnibus tests
					F	Num df	Den df	p
Group					73.41	1	21	< .001
GenderCombination	GenderCombination	GenderCombination	GenderCombination	GenderCombination	10.05	1	105	0.002
ListeningConditon	ListeningConditon	ListeningConditon	ListeningConditon	ListeningConditon	133.03	2	105	< .001
Group ✻ GenderCombination	Group ✻ GenderCombination	Group ✻ GenderCombination	Group ✻ GenderCombination	Group ✻ GenderCombination	11.88	1	105	< .001
Group ✻ ListeningConditon	Group ✻ ListeningConditon	Group ✻ ListeningConditon	Group ✻ ListeningConditon	Group ✻ ListeningConditon	28.81	2	105	< .001
GenderCombination ✻ ListeningConditon	GenderCombination ✻ ListeningConditon	GenderCombination ✻ ListeningConditon	GenderCombination ✻ ListeningConditon	GenderCombination ✻ ListeningConditon	16.79	2	105	< .001
Group ✻ GenderCombination ✻ ListeningConditon	Group ✻ GenderCombination ✻ ListeningConditon	Group ✻ GenderCombination ✻ ListeningConditon	Group ✻ GenderCombination ✻ ListeningConditon	Group ✻ GenderCombination ✻ ListeningConditon	3.73	2	105	0.027
Note. Satterthwaite method for degrees of freedom
Fixed Effects Parameter Estimates
											95% Confidence Interval
Names					Effect				Estimate	SE	Lower	Upper	df	t	p
(Intercept)	(Intercept)	(Intercept)	(Intercept)	(Intercept)	(Intercept)				1.365	0.257	0.861	1.869	21	5.31	< .001
Group1	HI - NH	Group1	HI - NH	Group1	HI - NH				-4.408	0.514	-5.416	-3.399	21	-8.57	< .001
GenderCombination1	Different - Same	GenderCombination1	Different - Same	GenderCombination1	Different - Same				-0.963	0.304	-1.559	-0.367	105	-3.17	0.002
ListeningConditon1	Left - Both	ListeningConditon1	Left - Both	ListeningConditon1	Left - Both				-5.283	0.372	-6.012	-4.553	105	-14.19	< .001
ListeningConditon2	Right - Both	ListeningConditon2	Right - Both	ListeningConditon2	Right - Both				-5.234	0.372	-5.964	-4.504	105	-14.06	< .001
Group1 ✻ GenderCombination1	HI - NH ✻ Different - Same	Group1 ✻ GenderCombination1	HI - NH ✻ Different - Same	Group1 ✻ GenderCombination1	HI - NH ✻ Different - Same				2.096	0.608	0.904	3.287	105	3.45	< .001
Group1 ✻ ListeningConditon1	HI - NH ✻ Left - Both	Group1 ✻ ListeningConditon1	HI - NH ✻ Left - Both	Group1 ✻ ListeningConditon1	HI - NH ✻ Left - Both				4.408	0.745	2.949	5.867	105	5.92	< .001
Group1 ✻ ListeningConditon2	HI - NH ✻ Right - Both	Group1 ✻ ListeningConditon2	HI - NH ✻ Right - Both	Group1 ✻ ListeningConditon2	HI - NH ✻ Right - Both				5.267	0.745	3.808	6.727	105	7.07	< .001
GenderCombination1 ✻ ListeningConditon1	Different - Same ✻ Left - Both	GenderCombination1 ✻ ListeningConditon1	Different - Same ✻ Left - Both	GenderCombination1 ✻ ListeningConditon1	Different - Same ✻ Left - Both				3.342	0.745	1.882	4.801	105	4.49	< .001
GenderCombination1 ✻ ListeningConditon2	Different - Same ✻ Right - Both	GenderCombination1 ✻ ListeningConditon2	Different - Same ✻ Right - Both	GenderCombination1 ✻ ListeningConditon2	Different - Same ✻ Right - Both				4.035	0.745	2.576	5.494	105	5.42	< .001
Group1 ✻ GenderCombination1 ✻ ListeningConditon1	HI - NH ✻ Different - Same ✻ Left - Both	Group1 ✻ GenderCombination1 ✻ ListeningConditon1	HI - NH ✻ Different - Same ✻ Left - Both	Group1 ✻ GenderCombination1 ✻ ListeningConditon1	HI - NH ✻ Different - Same ✻ Left - Both				-4.031	1.489	-6.95	-1.113	105	-2.71	0.008
Group1 ✻ GenderCombination1 ✻ ListeningConditon2	HI - NH ✻ Different - Same ✻ Right - Both	Group1 ✻ GenderCombination1 ✻ ListeningConditon2	HI - NH ✻ Different - Same ✻ Right - Both	Group1 ✻ GenderCombination1 ✻ ListeningConditon2	HI - NH ✻ Different - Same ✻ Right - Both				-2.488	1.489	-5.407	0.43	105	-1.67	0.098
